# Supplementary material for: Synthesis of monodispersed fcc and fct FePt/FePd nanoparticles by microwave irradiation
Source: Royal Society of Chemistry journal article supplement (doi:10.1039/b511850f), 2005-01-01
Supplement: b511850f.pdf [file b511850f.pdf]

## Synthesis of monodispersed fcc and fct FePt/FePd nanoparticles by microwave irradiation

H. Loc Nguyen<sup>a</sup>, Luciano E. M. Howard<sup>a</sup>, Sean R. Giblin<sup>b</sup>, Brian K. Tanner<sup>b</sup>, Ian Terry<sup>b</sup>, Andrew K. Hughes<sup>a</sup>, Ian M. Ross<sup>c</sup>, Arnaud Serres<sup>b</sup>, Hannah B rckst mmer<sup>a</sup> and John S. O. Evans<sup>a\*</sup>

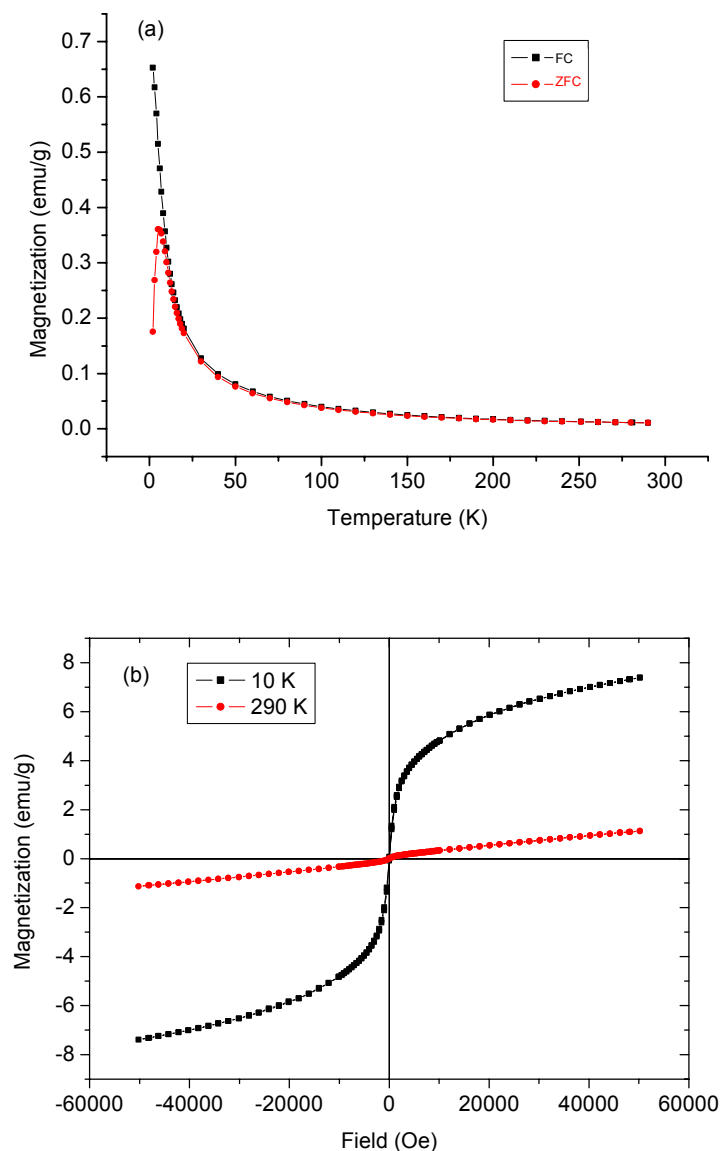

**Fig. S1** (a) ZFC and FC magnetisation curves as function of temperature from 5 to 300 K at a field 100 Oe; (b) Magnetic hysteresis loops measured at 10 and 290 K of as-prepared fcc FePt particles sample 2 of Table 1.

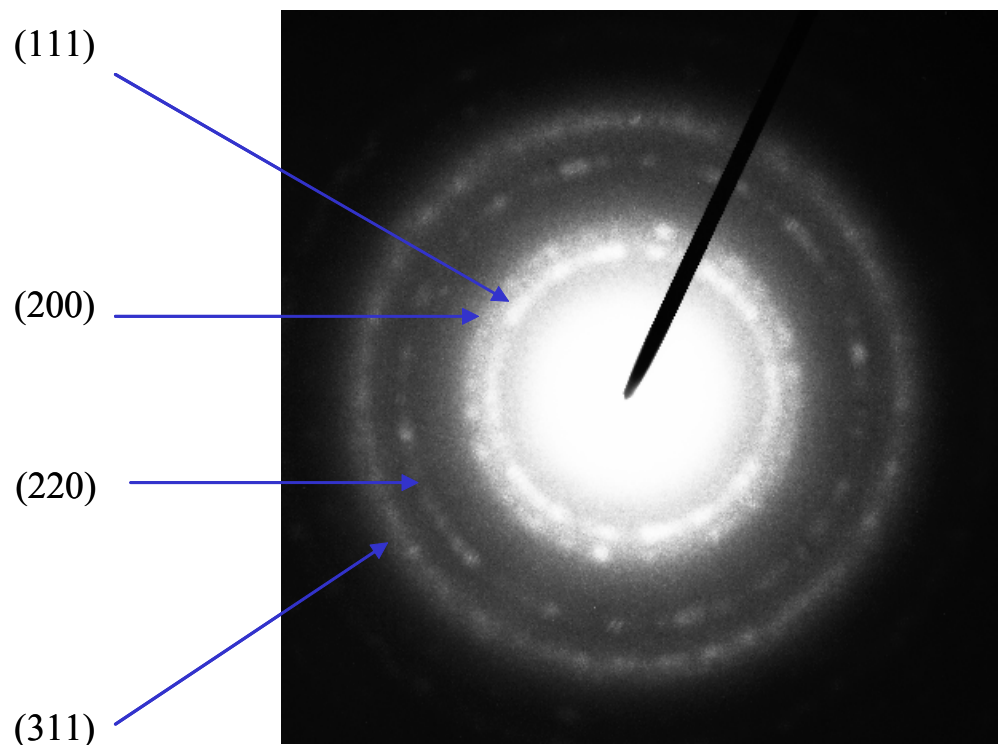

**Fig. S2** SAED pattern of sample 1 showing broad diffraction rings derived from ~300 ~random orientated nanoparticles showing (111), (200), (220) and (311) reflections.

| Miller indices | SAED d spacing (nm) | XRD d spacing (nm) |
|----------------|---------------------|--------------------|
| (111)          | 0.23-0.21           | 0.224              |
| (200)          | 0.20-0.19           | 0.194              |
| (220)          | 0.14-0.13           | 0.137              |
| (311)          | 0.12-0.11           | 0.117              |

**Table S1** SAED and XRD d-spacings of 2.6 nm particles (sample 1 of Table 1).

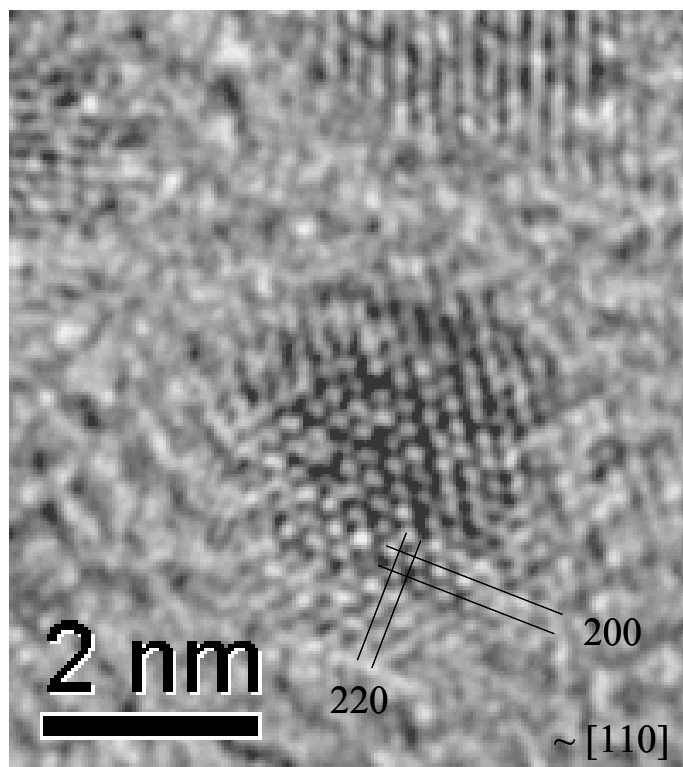

**Fig. S3** The HRTEM images orientated near (110) zone shows single crystals with lattice fringes consistent with the (200) and (220) d-spacing of  $\sim 1.9$  Å and  $\sim 1.3$  Å respectively.

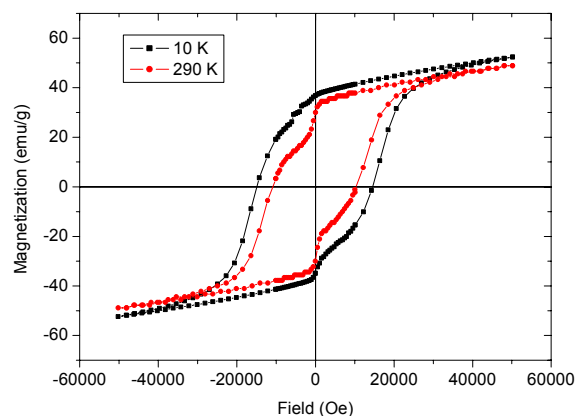

**Fig. S4** Hysteresis loops of post-annealed sample showing high coercivity  $\sim 10$  kOe (290 K) and  $\sim 14$  kOe (10 K). Sample was synthesized in a closed system in the presence of oleic acid and oleyl amine as surfactants in octyl ether at 280 °C and annealed to give fct FePt nanoparticles at 688 K in an experiment equivalent to that of Fig.5. The sample shows a high susceptibility close to  $H=0$  at 290 K. Similar features have been observed in the literature and ascribed to 2-phase magnetic behaviour related either to particle size dependence of the fcc $\rightarrow$ fct transition or to chemical composition fluctuations.<sup>4d,16</sup>

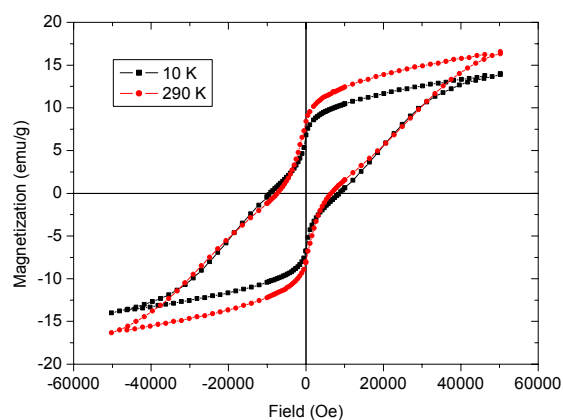

**Fig. S5** Hysteresis loops (10 and 290 K) of as-prepared sample containing mixture of fcc and fct FePt particles.
